# Supplementary material for: Three-dimensional cross-linked Co-MoS2 catalyst on carbon cloth for efficient hydrogen evolution reaction
Source: Royal Society of Chemistry journal article supplement (doi:10.1039/d1dt03411a), 2021-12-01
Supplement: d1dt03411a1.pdf [file d1dt03411a1.pdf]

## Supporting Information

### **Three-dimension Cross-linked Co-MoS<sub>2</sub> Catalyst on Carbon Cloth for Efficient Hydrogen Evolution Reaction**

Yan Xiao, Jing Yao, Tianze Zhang, Xinzhi Ma, Dexin Xu, and Hong Gao\*.

*School of Physics and Electronic Engineering, Key Laboratory for Photonic and Electronic Bandgap Materials, Ministry of Education, Harbin Normal University, Harbin 150025, People's Republic of China*

\*Corresponding author.

*E-mail address: [gaohong65cn@126.com](mailto:gaohong65cn@126.com)*

**Chemicals.** Thiourea ( $\text{CH}_4\text{N}_2\text{S}$ , Aladdin Chemistry Co., Ltd, AR), cobalt nitrate hexahydrate ( $\text{Co}(\text{NO}_3)_2 \cdot 6\text{H}_2\text{O}$ , Shanghai Macklin Biochemical Technology Co., Ltd, AR), urea ( $\text{CH}_4\text{N}_2\text{O}$ , Aladdin Chemistry Co., Ltd, AR), ammonium molybdate tetrahydrate ( $(\text{NH}_4)_6\text{Mo}_7\text{O}_{24} \cdot 4\text{H}_2\text{O}$ , Aladdin Chemistry Co., Ltd, ACS) and potassium hydroxide (KOH, Shanghai Macklin Biochemical Technology Co., Ltd, AR) were used directly without any further purification. The first-grade deionized (DI) water used in all experiments.

**Synthesis of  $\text{MoS}_2/\text{CC}$ .** For comparative studies, pure  $\text{MoS}_2$  was synthesized to attain insights into the relationship between architecture and catalytic activity. Except without adding CoCH precursor, pure  $\text{MoS}_2$  was prepared using a process similar to Co- $\text{MoS}_2$ -4/CC.

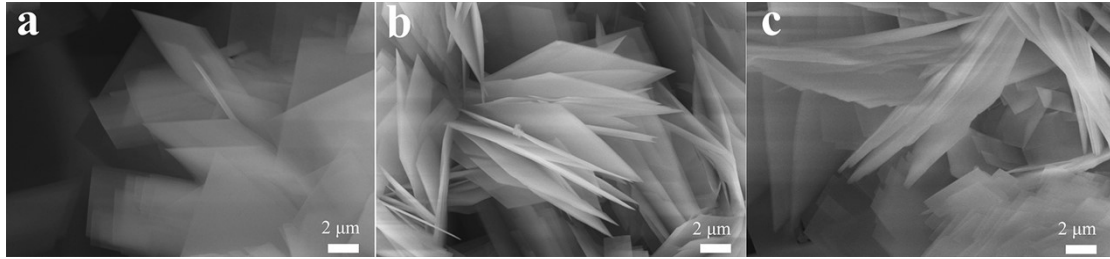

**Figure S1.** (a-c) High magnificant SEM images of CoCH-1/CC, CoCH-4/CC, and CoCH-8/CC, respectively.

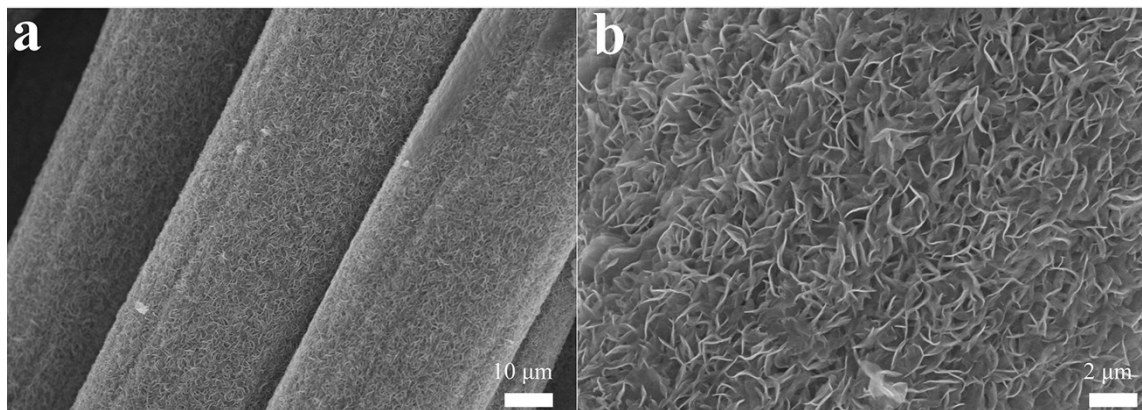

**Figure S2.** (a-b) Low and high magnificant SEM images of bare MoS<sub>2</sub>.

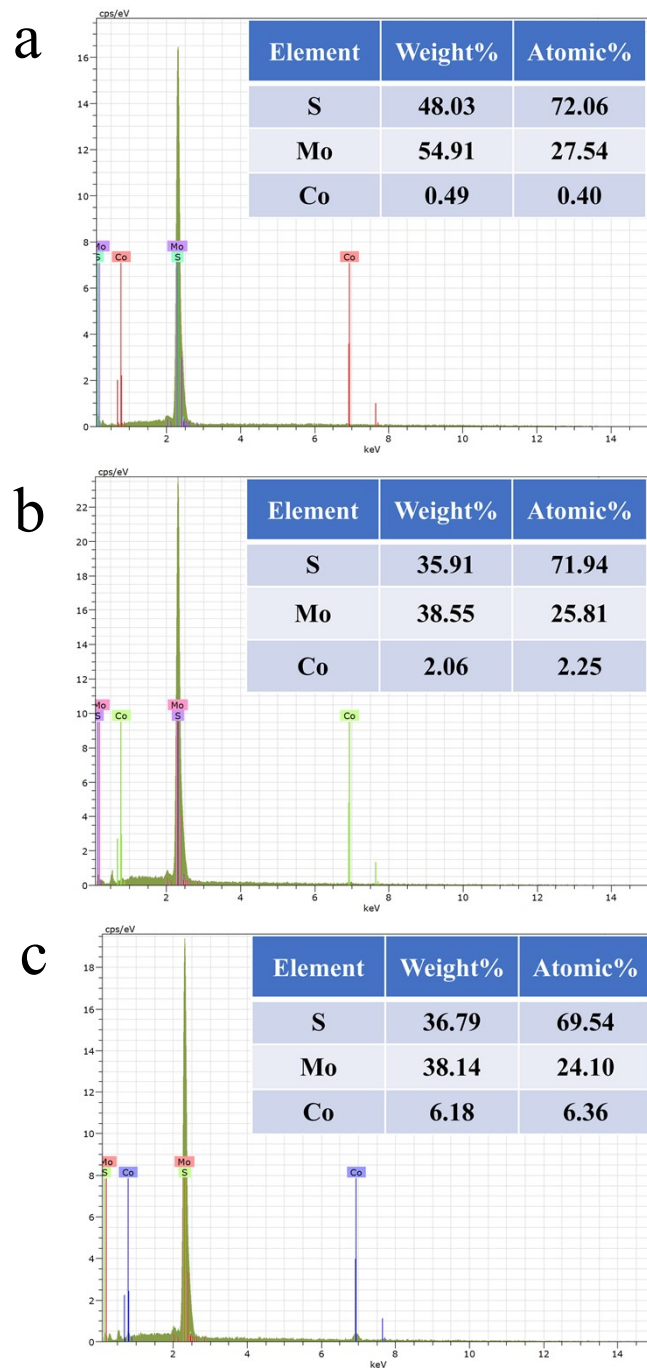

**Figure S3.** (a-c) EDS data of Co-MoS<sub>2</sub>-1, Co-MoS<sub>2</sub>-4, and Co-MoS<sub>2</sub>-8, respectively; insets show the corresponding stoichiometric ratios of S, Mo, and Co.

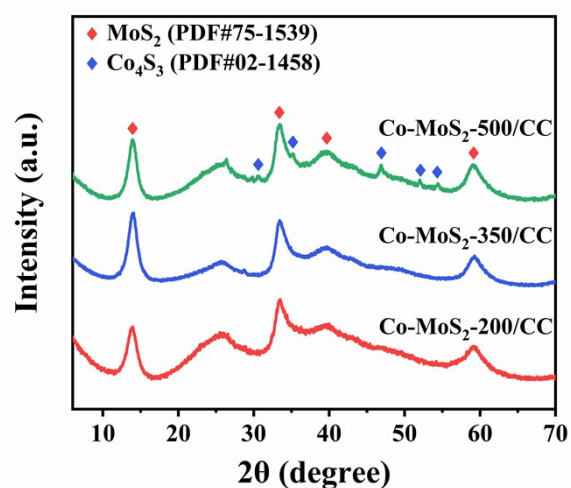

**Figure S4.** XRD patterns of the 3DSC Co-MoS<sub>2</sub>-4/CC nanostructure synthesized at different reduction temperatures.

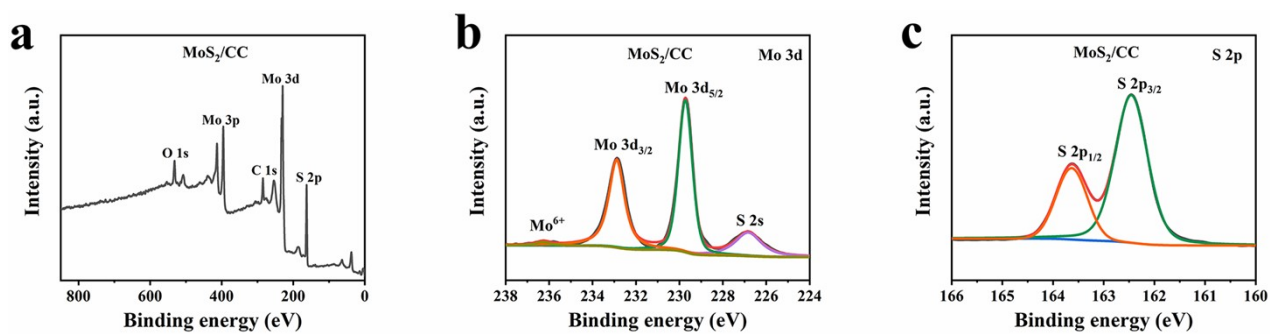

**Figure S5.** X-ray photoelectron spectroscopy (XPS) results of MoS<sub>2</sub>/CC: (a) survey, (b) Mo 3d, and (c) S 2p regions.

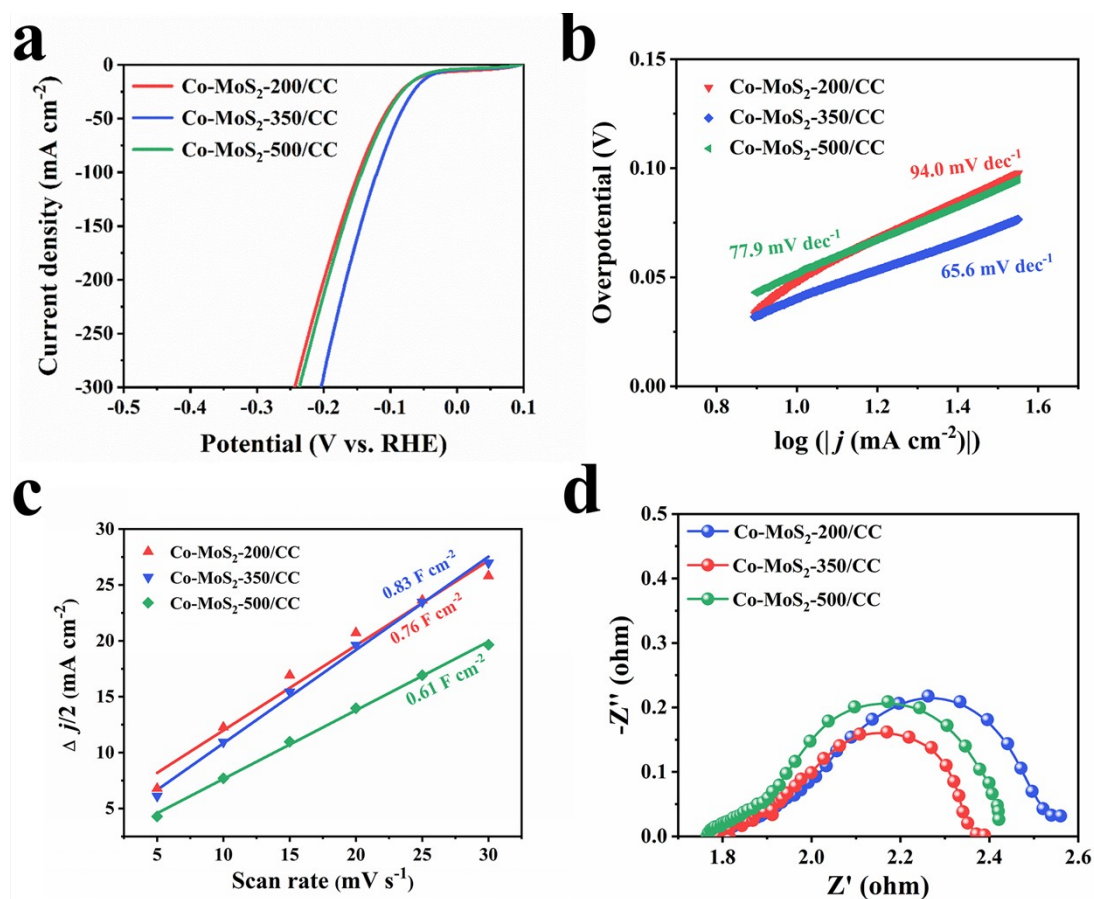

**Figure S6.** Comparison of HER activities of samples synthesized at changing annealing temperatures in 1 M KOH electrolyte. (a) The HER polarization curves and (b) Tafel plots for a series of Co-MoS<sub>2</sub>-200/CC, Co-MoS<sub>2</sub>-350/CC, and Co-MoS<sub>2</sub>-500/CC electrocatalysts in 1 M KOH electrolyte. (c) Plots of  $\Delta j/2$  versus scan rates. (d) Nyquist plots at an overpotential of 200 mV for electrodes.

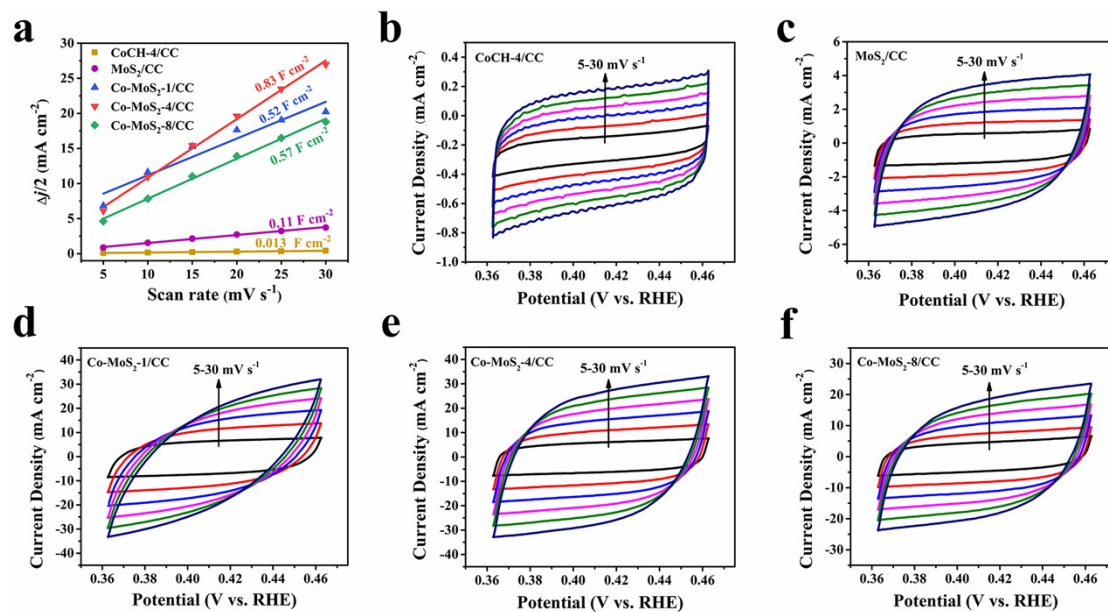

**Figure S7.** (a) Double layer capacitance estimated from the linear slope between  $\Delta j$  ( $= j_a - j_c$ ) and scan rates. (b-f) CV curves at different scan rates for all synthesized catalysts.

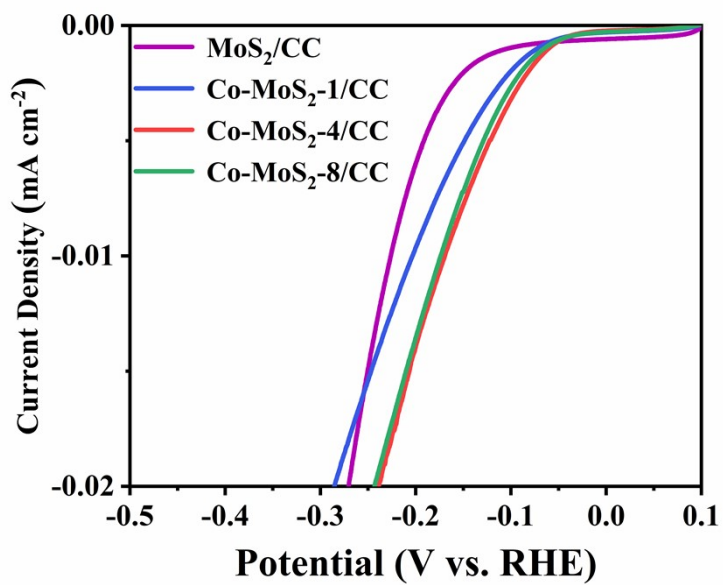

**Figure S8.** The final catalytic activity of a series of Co-MoS<sub>2</sub>/CC electrodes after excluding the electrochemical surface area effects. Electrolyte: 1M KOH.



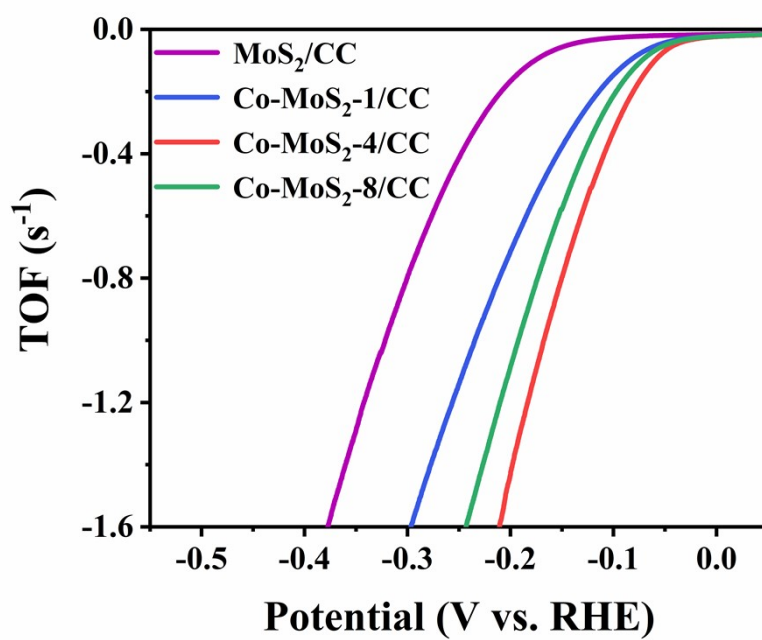

**Figure S9.** Potential-dependent TOF values of a series of Co-MoS<sub>2</sub>/CC electrodes.

Table S1. Comparison of HER activity of Co-MoS<sub>2</sub>-4/CC catalyst with other reported electrocatalysts in 1 M KOH electrolyte.

| Catalyst                                                | $\eta_{10}$ (mV) | Reference                                   |
|---------------------------------------------------------|------------------|---------------------------------------------|
| Co-MoS <sub>2</sub> -4/CC                               | 40               | This Work                                   |
| MoS <sub>2</sub> /Ni <sub>2</sub> O <sub>3</sub> H      | 84               | Small, 2020, 16, 2002212                    |
| Co <sub>9</sub> S <sub>8</sub> -MoS <sub>2</sub> /NF    | 110              | Adv. Funct. Mater., 30, 2020, 2002536       |
| Ni/M-MoS <sub>2</sub>                                   | 145              | ChemElectroChem, 2020, 7, 3606-3615         |
| 1T-MoS <sub>2</sub> /CoS <sub>2</sub>                   | 71               | Small, 2020, 16, 2002850                    |
| MoS <sub>2</sub> /CoS <sub>2</sub> NTs                  | 85               | J. Mater. Chem., A, 2019, 7, 13339-13346    |
| 1T-MoS <sub>2</sub> QS/Ni(OH) <sub>2</sub>              | 57               | Adv. Funct. Mater., 30, 2020, 2000551       |
| MoS <sub>2</sub> /FNS/FeNi                              | 120              | Adv. Mater., 30, 2018, 1803151              |
| Co-Ni <sub>3</sub> S <sub>2</sub> -MoS <sub>2</sub> /CA | 89               | Small, 2021, 17, 2006730                    |
| Co <sub>3</sub> O <sub>4</sub> /MoS <sub>2</sub>        | 205              | Appl. Catal. B-Environ., 2019, 248, 202-210 |
| Co <sub>4</sub> S <sub>3</sub> /MoC-NSC-2               | 82.5             | Appl. Catal. B-Environ., 2020, 260, 118197  |
| N-NiS/NiS <sub>2</sub>                                  | 185              | Chem. Eng. J., 2020, 397, 125507            |
| Ni <sub>2</sub> P/Ni <sub>3</sub> S <sub>2</sub>        | 80               | Nano Energy, 2018, 51, 26-36                |
